# Supplementary material
Source: PubMed Central journal article supplement (PMC4139110)
Supplement: NIHMS614502-supplement-Budenzsupppdf.pdf [file NIHMS614502-supplement-Budenzsupppdf.pdf]

## Supplementary Online Content

Budenz DL, Barton K, Whiteside-de Vos J, et al; for the Tema Eye Survey Study Group. Prevalence of glaucoma in an urban West African Population: the Tema Eye Survey. *JAMA Ophthalmol*. Published online March 28, 2013. doi:10.1001/jamaophth.2013.1686.

**eTable 1.** Prevalence of Open-Angle Glaucoma in People Not of African Descent

**eTable 2.** Prevalence of Open-Angle Glaucoma and Male-Female Prevalence Ratio

### eReferences

This supplementary material has been provided by the authors to give readers additional information about their work.

**eTable 1. Prevalence of Open-Angle Glaucoma in People Not of African Descent**

| Study                                                       | No. (≥40 Years) <sup>a</sup> | OAG Cases | Recruitment, % | Female, %       | Prevalence per 100, % |                       |
|-------------------------------------------------------------|------------------------------|-----------|----------------|-----------------|-----------------------|-----------------------|
|                                                             |                              |           |                |                 | Observed (95% CI)     | Adjusted <sup>b</sup> |
| <b>European derived</b>                                     |                              |           |                |                 |                       |                       |
| Baltimore Eye Survey <sup>1</sup><br>(Maryland)             | 2913                         | 32        | 84             | 58 <sup>c</sup> | 1.1 (0.8-1.6)         | 1.0                   |
| Beaver Dam <sup>2</sup><br>(Wisconsin)                      | 4926                         | 104       | 83             | 56              | 2.1 (1.7-2.6)         | 2.0                   |
| Framingham <sup>3</sup><br>(Massachusetts)                  | 2477                         | 64        | 84             | 58              | 2.6 (2.0-3.3)         | 2.7                   |
| Rotterdam <sup>4</sup><br>(Netherlands)                     | 6281                         | 50        | 79             | 58              | 0.8 (0.6-1.0)         | 0.9                   |
| Blue Mountains <sup>5,6</sup><br>(Australia)                | 3654                         | 87        | 82             | 57              | 2.4 (1.9-2.9)         | 1.8 <sup>d</sup>      |
| <b>European derived Total<sup>e</sup></b>                   |                              |           |                |                 |                       | 1.4                   |
| <b>Hispanic or Latino</b>                                   |                              |           |                |                 |                       |                       |
| Proyecto VER <sup>7</sup> (Arizona)                         | 4774                         | 94        | 72             | 61              | 2.0 (1.6-2.4)         | 2.7 <sup>d</sup>      |
| LALES <sup>8,9</sup> (California)                           | 6142                         | 291       | 82             | 58              | 4.7 (4.2-5.3)         | 6.9                   |
| <b>Hispanic or Latino Total</b>                             |                              |           |                |                 |                       | 5.1 <sup>f</sup>      |
| <b>Indian Asian</b>                                         |                              |           |                |                 |                       |                       |
| Aravind <sup>10</sup><br>(Southern India)                   | 5150                         | 64        | 93             | 55              | 1.2 (0.9-1.5)         | 1.1                   |
| Andhra Pradesh Urban <sup>11</sup><br>(Southeastern India)  | 934                          | 37        | 85             | 54              | 4.0 (2.8-5.5)         | NA                    |
| Andhra Pradesh Rural <sup>11</sup><br>(Southeastern India)  | 2790                         | 45        | 88             | 53              | 1.6 (1.2-2.2)         | NA                    |
| Chennai Urban <sup>12,13</sup><br>(Southern India)          | 3850                         | 135       | 80             | 56              | 3.5 (3.0-4.2)         | 4.2                   |
| Chennai Rural <sup>12,13</sup><br>(Southern India)          | 3924                         | 64        | 82             | 55              | 1.6 (1.3-2.1)         | 1.8                   |
| West Bengal <sup>14</sup><br>(Eastern India)                | 1269                         | 38        | 83             | 52              | 3.0 (2.1-4.1)         | 3.4                   |
| <b>Indian Asian Total</b>                                   |                              |           |                |                 |                       | 2.3                   |
| <b>Asian</b>                                                |                              |           |                |                 |                       |                       |
| Beijing <sup>15</sup><br>(Northern China)                   | 4315                         | 111       | 83             | 56              | 2.6 (2.1-3.1)         | 3.0                   |
| Liwan District, Guangzhou <sup>16</sup><br>(Southern China) | 1405                         | 29        | 75             | 56              | 2.1 (1.4-3.0)         | NA                    |
| Singapore Chinese <sup>17</sup><br>(Malaysia)               | 2000                         | 22        | 72             | 53              | 1.1 (0.7-1.7)         | NA                    |
| Singapore Malay <sup>18</sup><br>(Malaysia)                 | 3280                         | 104       | 79             | 52              | 3.2 (2.6-3.8)         | 2.9                   |
| <b>Chinese and Malay Total</b>                              |                              |           |                |                 |                       | 3.0                   |
| Tajimi Study <sup>19</sup><br>(Central Japan)               | 3021                         | 119       | 78             | 56              | 3.9 (3.3-4.7)         | 4.2                   |

Abbreviations: NA, not adjustable because of insufficient data to adjust for age or gender to the population structure of Barbados in 1990; OAG, open-angle glaucoma.

<sup>a</sup>Age of 40 years or older except: Beaver Dam, age of 43 years or older; Blue Mountains, age of 49 years or older; Framingham, age of 52 years or older; Liwan District, age of 50 years or older; and Rotterdam, age of 55 years or older.

<sup>b</sup>Adjusted for age and sex using the population structure of Barbados in 1990, which was 92.5% black and 2.4% mixed.<sup>20</sup>

<sup>c</sup>Friedman DS, Tielsch JM, Johns Hopkins Bloomberg School of Public Health, personal communication, June 23, 2011.

<sup>d</sup>Adjusted for age (insufficient data for sex adjustment), using the population structure of Barbados in 1990.

<sup>e</sup>Beaver Dam excluded because used intraocular pressure of 22 mm Hg or higher as part of diagnostic criteria.

<sup>f</sup>Age-adjusted for both Proyecto VER and LALES; sex-adjusted only for LALES

© 2013 American Medical Association. All rights reserved.

**eTable 2: Prevalence of Open-Angle Glaucoma and Male-Female Prevalence Ratio**

| Study                                                             | % Female          |                    | Observed Prevalence per 100, % |                 | Adjusted* Prevalence per 100, % |                 | Prevalence Ratio M:F |                        |
|-------------------------------------------------------------------|-------------------|--------------------|--------------------------------|-----------------|---------------------------------|-----------------|----------------------|------------------------|
|                                                                   | Study             | Popula-<br>tion    | Male (95% CI)                  | Female (95% CI) | Male (95% CI)                   | Female (95% CI) | Observed             | Adjusted <sup>a</sup>  |
| <b>African-derived</b>                                            |                   |                    |                                |                 |                                 |                 |                      |                        |
| Tema Eye Survey<br>2006-2008                                      | 60.3              | 51.8 <sup>26</sup> | 7.9 (6.8-9.1)                  | 4.9 (4.2-5.7)   | 7.6 (6.6-8.8)                   | 5.2 (4.5-6.0)   | 1.6                  | 1.5 ( <i>P</i> < .001) |
| St. Lucia <sup>21</sup><br>1986-1987<br>(Caribbean)               | 66.5              | 55.2 <sup>27</sup> | 9.9 (7.2-13)                   | 10.3 (8.3-13)   | 9.2 (6.6-13)                    | 9.9 (8.0-12)    | 0.96                 | 0.93                   |
| Barbados <sup>22</sup><br>1988-1992<br>(Caribbean)                | 57.1              | 55.9 <sup>20</sup> | 8.3 (7.1-9.7)                  | 5.7 (4.9-6.7)   | 8.2 (7.0-9.6)                   | 6.7 (5.7-7.7)   | 1.5                  | 1.2 ( <i>P</i> = .06)  |
| Baltimore Eye Survey <sup>1</sup><br>1985-1988<br>(Maryland, USA) | 62.5 <sup>b</sup> | 56.3 <sup>28</sup> | 4.8 (3.5-6.5)                  | 3.8 (2.9-4.9)   | 4.2 (3.0-5.8)                   | 3.7 (2.8-4.9)   | 1.3                  | 1.1                    |
| East Africa <sup>23</sup><br>1996                                 | 55.4              | 54.1 <sup>29</sup> | NA                             | NA              | NA                              | NA              | NA                   | NA                     |
| South Africa, Urban <sup>24</sup><br>1998                         | 66.6              | 58.9 <sup>30</sup> | NA                             | NA              | 4.0                             | 2.0             | NA                   | 2.0 ( <i>P</i> = .09)  |
| South Africa, Rural <sup>25</sup><br>1998-1999                    | 72.1              | 58.9 <sup>30</sup> | 4.6                            | 2.1             | NA                              | NA              | 2.2                  | NS                     |
| <b>European-derived</b>                                           |                   |                    |                                |                 |                                 |                 |                      |                        |
| Baltimore Eye Survey <sup>1</sup><br>1985-1988                    | 58.4 <sup>b</sup> | 54.0 <sup>28</sup> | 1.0 (0.5-1.7)                  | 1.2 (0.7-1.8)   | 0.8 (0.4-1.5)                   | 0.9 (0.5-1.5)   | 0.8                  | 0.9                    |
| Framingham <sup>3</sup><br>1973<br>(Massachusetts, USA)           | 57.9              | 55.2 <sup>31</sup> | 3.5 (2.4-4.8)                  | 2.0 (1.3-2.8)   | 3.3 (2.3-4.6)                   | 1.9 (1.2-2.7)   | 1.8                  | 1.7 ( <i>P</i> = .03)  |
| Rotterdam <sup>4</sup><br>1990-1993<br>(Netherlands)              | 58.2              | 55.9 <sup>32</sup> | 1.1 (0.7-1.5)                  | 0.6 (0.4-0.9)   | 1.1 (0.7-1.5)                   | 0.6 (0.4-0.9)   | 1.8                  | 1.7 ( <i>P</i> = .06)  |
| Blue Mountains <sup>5</sup><br>1992-1994<br>(Australia)           | 57.5 <sup>6</sup> | 54.3 <sup>33</sup> | NA                             | NA              | NA                              | NA              | NA                   | NA                     |

© 2013 American Medical Association. All rights reserved.

**eTable 2: Prevalence of Open-Angle Glaucoma and Male-Female Prevalence Ratio (cont)**

| Study                                                                   | % Female |                                          | Observed Prevalence per 100, % |                 | Adjusted* Prevalence per 100, % |                 | Prevalence Ratio M:F |                       |
|-------------------------------------------------------------------------|----------|------------------------------------------|--------------------------------|-----------------|---------------------------------|-----------------|----------------------|-----------------------|
|                                                                         | Study    | Popula-<br>tion                          | Male (95% CI)                  | Female (95% CI) | Male (95% CI)                   | Female (95% CI) | Observed             | Adjusted <sup>a</sup> |
| <b>Hispanic or Latino</b>                                               |          |                                          |                                |                 |                                 |                 |                      |                       |
| Proyecto VER <sup>7</sup><br>1997-1999<br>(Arizona, USA)                | 61.2     | 52.4 <sup>34</sup>                       | NA                             | NA              | NA                              | NA              | NA                   | NA                    |
| LALES <sup>8,9</sup><br>2000-2003<br>(California, USA)                  | 57.7     | 53.3 <sup>35</sup>                       | 5.4 (4.6-6.4)                  | 4.4 (3.6-5.0)   | 4.7 (3.9-5.9)                   | 4.1 (3.5-4.9)   | 1.3                  | 1.1                   |
| <b>Indian Asian</b>                                                     |          |                                          |                                |                 |                                 |                 |                      |                       |
| Aravind <sup>10</sup><br>1995-1997<br>(Southern India)                  | 55.1     | 50.0 <sup>36</sup>                       | 1.9 (1.3-2.5)                  | 0.7 (0.4-1.0)   | 1.4 (1.0-2.0)                   | 0.8 (0.5-1.2)   | 2.7                  | 1.8 ( <i>P</i> =.03)  |
| Andhra Pradesh Urban <sup>11</sup><br>1996-2000<br>(Southeastern India) | 54.0     | 49.4 <sup>37</sup>                       | NA                             | NA              | NA                              | NA              | NA                   | NS                    |
| Andhra Pradesh Rural <sup>11</sup><br>(Southeastern India)              | 53.0     | 49.4 <sup>37</sup>                       | NA                             | NA              | NA                              | NA              | NA                   | NS                    |
| Chennai Urban <sup>12</sup><br>2002-2004<br>(Southern India)            | 55.6     | 49.4 <sup>37</sup><br>48.3 <sup>38</sup> | 3.7 (2.9-4.8)                  | 3.3 (2.6-4.2)   | 3.5 (2.6-4.5)                   | 3.4 (2.6-4.2)   | 1.1                  | 1.0                   |
| Chennai Rural <sup>13</sup><br>2001-2003<br>(Southern India)            | 55.1     | 49.4 <sup>37</sup><br>50.0 <sup>38</sup> | 1.7 (1.1-2.4)                  | 1.6 (1.1-2.2)   | 1.5 (1.0-2.2)                   | 1.5 (1.0-2.1)   | 1.1                  | 1.0                   |
| West Bengal <sup>14</sup><br>1998-1999<br>(Eastern India)               | 51.9     | 49.8 <sup>37</sup>                       | 3.6 (2.3-5.5)                  | 2.4 (1.4-3.9)   | 3.6 (2.3-5.5)                   | 2.4 (1.4-3.9)   | 1.5                  | 1.5 ( <i>P</i> =.24)  |

© 2013 American Medical Association. All rights reserved.

**eTable 2: Prevalence of Open-Angle Glaucoma and Male-Female Prevalence Ratio (cont)**

| Study                                                                       | % Female |                    | Observed Prevalence per 100, % |                 | Adjusted* Prevalence per 100, % |                 | Prevalence Ratio M:F |                       |
|-----------------------------------------------------------------------------|----------|--------------------|--------------------------------|-----------------|---------------------------------|-----------------|----------------------|-----------------------|
|                                                                             | Study    | Popula-tion        | Male (95% CI)                  | Female (95% CI) | Male (95% CI)                   | Female (95% CI) | Observed             | Adjusted <sup>a</sup> |
| <b>Asian</b>                                                                |          |                    |                                |                 |                                 |                 |                      |                       |
| Beijing <sup>15</sup><br>2001<br>(Northern China)                           | 56.2     | 49.2 <sup>39</sup> | 3.3 (2.6-4.3)                  | 2.0 (1.5-2.6)   | 3.0 (2.3-3.9)                   | 1.9 (1.4-2.6)   | 1.7                  | 1.6 ( <i>P</i> = .03) |
| Liwan District,<br>Guangzhou <sup>16</sup><br>2003-2004<br>(Southern China) | 56.4     | 49.8 <sup>40</sup> | 3.4 (2.1-5.2)                  | 1.0 (0.4-2.0)   | NA                              | NA              | 3.4                  | NA                    |
| Singapore Chinese <sup>17</sup><br>1997-1998<br>(Malaysia)                  | 54.9     | 52.0 <sup>41</sup> | 1.7 (0.9-2.7)                  | 0.6 (0.3-1.3)   | NA                              | NA              | 2.6                  | NA                    |
| Singapore Malay <sup>18</sup><br>2004-2006<br>(Malaysia)                    | 52.0     | 52.0 <sup>42</sup> | 3.7 (2.8-4.8)                  | 2.6 (1.9-3.5)   | 2.5 (2.4-2.6)                   | 2.5 (2.4-2.6)   | 1.4                  | 1.0                   |
| Tajimi Study <sup>19</sup><br>2000-2001<br>(Central Japan)                  | 55.8     | 52.6 <sup>43</sup> | 4.3 (3.2-5.5)                  | 3.7 (2.8-4.7)   | 4.3 (3.2-5.5)                   | 4.0 (3.1-5.0)   | 1.2                  | 1.1                   |

Note: All study populations were age 40+ years except: Blue Mountains: age 49+, Framingham: age 52+, Liwan District: age 50+, Rotterdam: age 55+, West Bengal: age 50+

Abbreviations: NA, data not available or insufficient for calculation of adjusted prevalence or ratio; NS, stated by authors to be not significant.

<sup>a</sup> Adjusted for age and sex of the local population at the time of the study, when data were available.

<sup>b</sup> Friedman DS, Tielsch JM, Johns Hopkins Bloomberg School of Public Health, personal communication, June 23, 2011.

## eReferences

1. Tielsch, JM, Sommer A, Katz J, Royall RM, Quigley HA, Javitt J. Racial variations in the prevalence of primary open-angle glaucoma. The Baltimore Eye Survey. *JAMA*. 1991;266(3):369-374.
2. Klein BE, Klein R, Sponsel WE, et al. Prevalence of glaucoma. The Beaver Dam Eye Study. *Ophthalmology*. 1992;99(10):1499-1504.

© 2013 American Medical Association. All rights reserved.

3. Kahn HA, Leibowitz HM, Ganley JP, et al. The Framingham Eye Study. I: Outline and major prevalence findings. *Am J Epidemiol*. 1977;106(1):17-32.
4. Wolfs RC, Borger PH, Ramrattan RS. et al. Changing views on open-angle glaucoma: definitions and prevalences—The Rotterdam Study. *Invest Ophthalmol Vis Sci*. 2000;41(11):3309-3321.
5. Mitchell P, Smith W, Attebo K, Healey PR. Prevalence of open-angle glaucoma in Australia. The Blue Mountains Eye Study. *Ophthalmology*. 1996;103(10):1661-1669.
6. Foran S, Mitchell P, Wang JJ. Five-year change in visual acuity and incidence of visual impairment: The Blue Mountains Eye Study. *Ophthalmology*. 2003;110(1):41-50.
7. Quigley HA, West SK, Rodriguez J, Munoz B, Klein R, Snyder R. The prevalence of glaucoma in a population-based study of Hispanic subjects: Proyecto VER. *Arch Ophthalmol*. 2001;119(12):1819-1826.
8. Varma R, Ying-Lai M, Francis BA, et al. Prevalence of open-angle glaucoma and ocular hypertension in Latinos: The Los Angeles Latino Eye Study. *Ophthalmology*. 2004;111(8):1439-1448.
9. Varma R, Paz SH, Azen SP, et al. The Los Angeles Latino Eye Study: design, methods, and baseline data. *Ophthalmology*. 2004;111(6):1121-1131.
10. Ramakrishnan R, Nirmalan PK, Krishnadas R, et al. Glaucoma in a rural population of southern India: the Aravind comprehensive eye survey. *Ophthalmology*. 2003;110(8):1484-1490.
11. Garudadri C, Senthil S, Khanna RC, Sannapaneni K, Rao HB. Prevalence and risk factors for primary glaucomas in adult urban and rural populations in the Andhra Pradesh Eye Disease Study. *Ophthalmology*. 2010;117(7):1352-1359.

© 2013 American Medical Association. All rights reserved.

12. Vijaya L, George R, Baskaran M, et al. Prevalence of primary open-angle glaucoma in an urban south Indian population and comparison with a rural population. The Chennai Glaucoma Study. *Ophthalmology*. 2008;115(4):648-654.
13. Vijaya L, George R, Paul PG, et al. Prevalence of open-angle glaucoma in a rural south Indian population. *Invest Ophthalmol Vis Sci*. 2005;46(12):4461-4467.
14. Raychaudhuri A, Lahiri SK, Bandyopadhyay M, Foster PJ, Reeves BC, Johnson GJ. A population based survey of the prevalence and types of glaucoma in rural West Bengal: the West Bengal Glaucoma Study. *Br J Ophthalmol*. 2005;89(12):1559-1564.
15. Wang YX, Xu L, Yang H, Jonas JB. Prevalence of glaucoma in North China: the Beijing Eye Study. *Am J Ophthalmol*. 2010;150(6):917-924.
16. He M, Foster PJ, Ge J, et al. Prevalence and clinical characteristics of glaucoma in adult Chinese: a population-based study in Liwan District, Guangzhou. *Invest Ophthalmol Vis Sci*. 2006;47(7):2782-2788.
17. Foster PJ, Oen FT, Machin D, et al. The prevalence of glaucoma in Chinese residents of Singapore: a cross-sectional population survey of the Tanjong Pagar district. *Arch Ophthalmol*. 2000;118(8):1105-1111.
18. Shen SY, Wong TY, Foster PJ, et al. The prevalence and types of glaucoma in Malay people: the Singapore Malay eye study. *Invest Ophthalmol Vis Sci*. 2008;49(9):3846-3851.
19. Iwase A, Suzuki Y, Araie M, et al. The prevalence of primary open-angle glaucoma in Japanese: The Tajimi Study. *Ophthalmology*. 2004;111(9):1641-1648.
20. Caricom Capacity Development Programme (CCDP). 2000 Round of Population and Housing Census Sub-Project. National Census Report Barbados. 2000;30:219-224.

<http://www.google.com/url?sa=t&source=web&cd=22&ved=0CCIQFjABOBQ&url=http%3A%2F%2Fwww.caricomstats.org%2FFiles%2FPublications%2FNCR%2520Reports%2FBarbados.pdf&rct=j&q=Barbados%20Statistical%20Service%201990%20Population%20and%20Housing%20Census%20Report%2C%20Vol%201&ei=girZTcqVO6Hx0gG5rvn7Aw&usg=AFQjCNHHqJjpSPDLFiuRYKQjxBImzByqIg>. Accessed November 24, 2011.

21. Mason RP, Kosoko O, Wilson MR, et al. National survey of the prevalence and risk factors of glaucoma in St. Lucia, West Indies. Part I. Prevalence findings. *Ophthalmology*. 1989;96(9):1363-1368.
22. Leske MC, Connell AM, Schachat AP, Hyman L. The Barbados Eye Study. Prevalence of open angle glaucoma. *Arch Ophthalmol*. 1994;112(6):821-829.
23. Buhrmann RR, Quigley HA, Barron Y, West SK, Oliva MS, Mmbaga BB. Prevalence of glaucoma in a rural East African population. *Invest Ophthalmol Vis Sci*. 2000;41(1):40-48.
24. Rotchford AP, Kirwan JF, Muller MA, Johnson GJ, Roux P. Temba glaucoma study: a population-based cross-sectional survey in urban South Africa. *Ophthalmology*. 2003;110(2):376-382.
25. Rotchford AP, Johnson GJ. Glaucoma in Zulus: a population-based cross-sectional survey in a rural district in South Africa. *Arch Ophthalmol*. 2002;120(4):471-478.
26. U.S. Census Bureau International Programs, International Data Base, Population Pyramids, Ghana population structure 2006. [http://www.census.gov/population/international/data/idb/excel\\_output.php?5](http://www.census.gov/population/international/data/idb/excel_output.php?5). Accessed June 11, 2011.
27. US Census Bureau International Programs, International Data Base, Population Pyramids, St. Lucia population structure 1986. [http://www.census.gov/population/international/data/idb/excel\\_output.php?5](http://www.census.gov/population/international/data/idb/excel_output.php?5). Accessed June 11, 2011.

© 2013 American Medical Association. All rights reserved.



28. Spencer G. *Projections of the Population of the United States, by Age, Sex, and Race: 1988-2080*. US Bureau of the Census, Current Population Reports, Series P-25, No. 1018. Washington, DC: US Government Printing Office; 1989. Table 4. Projections of the Population, by Age, Sex, and Race, for the United States: 1988 to 2080, pp 38-39. <http://www.census.gov/prod/1/pop/p25-1018.pdf>. Accessed July 4, 2011.
29. US Census Bureau International Programs, International Data Base, Population Pyramids, Tanzania population structure 1996. [http://www.census.gov/population/international/data/idb/excel\\_output.php?5](http://www.census.gov/population/international/data/idb/excel_output.php?5). Accessed July 7, 2011.
30. StatsOnline. Primary Tables KwaZulu-Natal: Census 1996 and 2001 compared, 2001. Report 03-02-08. Statistics South Africa. Table 4.1: Age distribution in five-year intervals by population group and gender (numbers): KwaZulu-Natal 1996. <http://www.statssa.gov.za/publications/Report-03-02-08/Report-03-02-082001.pdf>. Accessed July 7, 2011.
31. US Census Bureau, Population Estimates, National Estimates, National Estimates by Age, Sex, Race: 1975. <http://www.census.gov/popest/archives/pre-1980/PE-11-1975.xls>. Accessed July 7, 2011.
32. US Bureau of the Census. International Programs. International Data Base, Netherlands Population 1995. [http://www.census.gov/population/international/data/idb/excel\\_output.php?5](http://www.census.gov/population/international/data/idb/excel_output.php?5). Accessed July 4, 2011.
33. Castles I. Census Counts for Small Areas: New South Wales. 1991 Census of Population and Housing. Australian Bureau of Statistics. Catalogue No. 2730.1. Commonwealth of Australia. 1993. Table 1. Age and Sex of Persons, Statistics Local Areas within Statistical Divisions and Statistical Subdivisions, New South Wales. p 13. [http://www.abs.gov.au/AUSSTATS/free.nsf/log?openagent&27101\\_1991\\_40\\_Census\\_Characteristics\\_of\\_New\\_South\\_Wales.pdf&2101.0&Publication&84B23E9876BC7B39CA2574BE0083182B&&1991&01.10.1993&Previous](http://www.abs.gov.au/AUSSTATS/free.nsf/log?openagent&27101_1991_40_Census_Characteristics_of_New_South_Wales.pdf&2101.0&Publication&84B23E9876BC7B39CA2574BE0083182B&&1991&01.10.1993&Previous). Accessed July 4, 2011.

© 2013 American Medical Association. All rights reserved.

34. US Census Bureau. Population Estimates for States by Age, Race, Sex, and Hispanic Origin: July 1, 1997 (ST-99-41) Population Estimates Program, Population Division, U.S. Census Bureau, Washington, DC, 20233, Arizona Population 1997.  
<http://www.census.gov/popest/archives/1990s/stasrh/sasrh97.txt>. Accessed July 4, 2011.
35. State of California, Department of Finance, Population Projections by Race/Ethnicity, Gender and Age for California and Its Counties 2000-2050, Sacramento, California, July 2007. Los Angeles County 2000. <http://www.dof.ca.gov/research/demographic/reports/projections/p-3/documents/LOS%20ANGELES.xls>. Accessed July 4, 2011.
36. U.S. Census Bureau International Programs, International Data Base, Population Pyramids, India Population Pyramid 1995.  
[http://www.census.gov/population/international/data/idb/excel\\_output.php?5](http://www.census.gov/population/international/data/idb/excel_output.php?5). Accessed July 4, 2011.
37. US Census Bureau International Programs, International Data Base, Population Pyramids, India Population Pyramid, Urban & Rural 2002.  
[http://www.census.gov/population/international/data/idb/excel\\_output.php?5](http://www.census.gov/population/international/data/idb/excel_output.php?5). Accessed July 7, 2011.
38. Arvind H, Paul PG, Raju P, et al. Methods and design of the Chennai Glaucoma Study. *Ophthalmic Epidemiol.* 2003;10(5):337-348.
39. US Census Bureau International Programs, International Data Base, Population Pyramids, China population structure 2001.  
[http://www.census.gov/population/international/data/idb/excel\\_output.php?5](http://www.census.gov/population/international/data/idb/excel_output.php?5). Accessed July 7, 2011.
40. US Census Bureau International Programs, International Data Base, Population Pyramids, China population structure 2003.  
[http://www.census.gov/population/international/data/idb/excel\\_output.php?5](http://www.census.gov/population/international/data/idb/excel_output.php?5). Accessed July 7, 2011.
41. Department of Statistics Singapore. Census of Population 2000 Statistical Release 1: Demographic Characteristics. Chinese Census.  
<http://www.singstat.gov.sg/pubn/popn/c2000sr1/excel/t1-7.xls#T4!A1>. Accessed July 7, 2011.

42. Department of Statistics Singapore. Census of Population 2000 Statistical Release 1: Demographic Characteristics. Malay Census.

<http://www.singstat.gov.sg/pubn/popn/c2000sr1/excel/t1-7.xls#T5!A1>. Accessed July 7, 2011.

© 2013 American Medical Association. All rights reserved.
